# Supplementary material for: Synergistic promotion of photoelectrochemical water splitting efficiency of TiO2 nanorod arrays by doping and surface modification
Source: Royal Society of Chemistry journal article supplement (doi:10.1039/d1tc02816b), 2021-01-01
Supplement: d1tc02816b1.pdf [file d1tc02816b1.pdf]

# **Synergistic Promotion of Photoelectrochemical Water Splitting Efficiency of TiO<sub>2</sub> Nanorod Arrays by Doping and Surface Modification**

*Zhao Liang<sup>1</sup>, Ding Chen<sup>1\*</sup>, Shang Xu<sup>1</sup>, Zhi Fang<sup>2</sup>, Lin Wang<sup>2</sup>, Weiyu  
Yang<sup>2</sup> and Huilin Hou<sup>2\*</sup>*

<sup>a</sup> State Key Laboratory of Advanced Design and Manufacturing for Vehicle Body,  
College of Mechanical and Vehicle Engineering, Hunan University, Changsha  
City, 410082, P.R. China

<sup>b</sup> Institute of Materials, Ningbo University of Technology, Ningbo City, 315211, P.R.  
China

---

\* Corresponding authors. E-mails: chending@hnu.edu.cn (D. Chen) and houhulin86@163.com (H. Hou)

Tel: +86-574-87080966, Fax: +86-574-87081221.

† Electronic supplementary information (ESI) available.

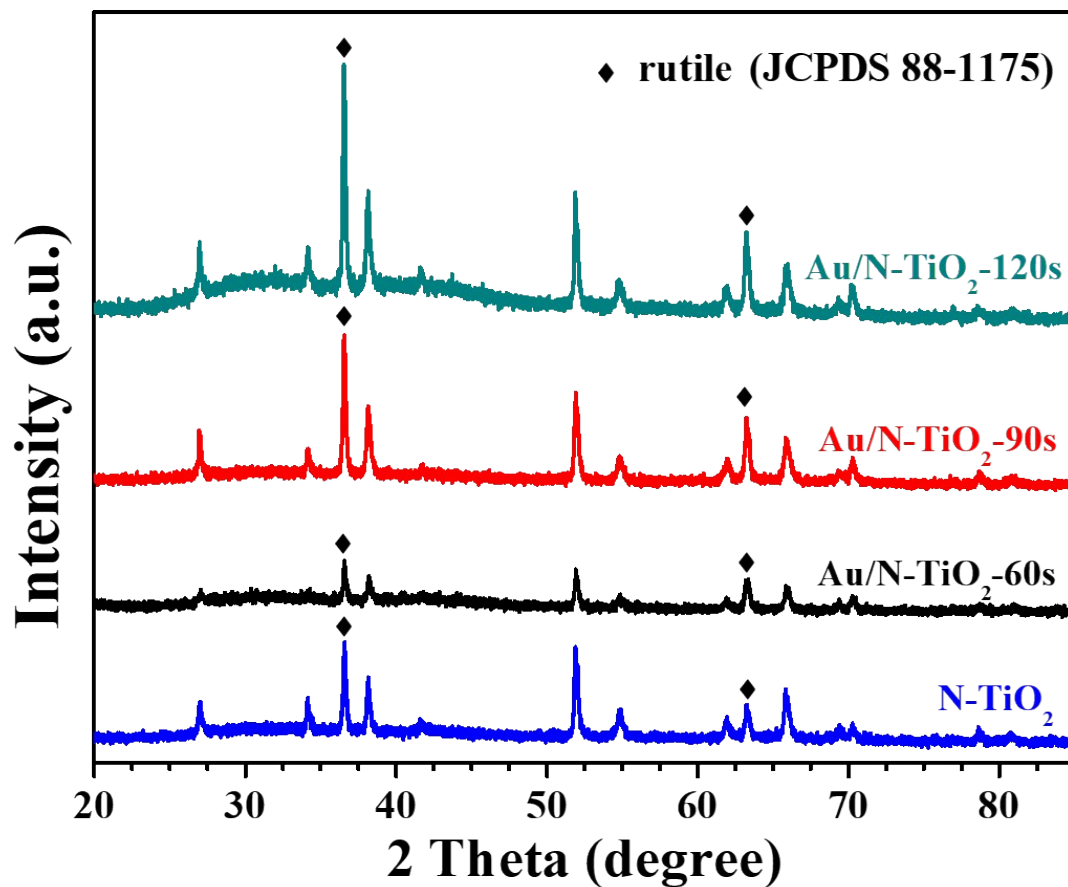

Fig. S1 XRD patterns of N-TiO<sub>2</sub> nanorods and Au/N-TiO<sub>2</sub> nanorods by magnetron sputtering of Au with different time (60 s, 90 s, 120 s).

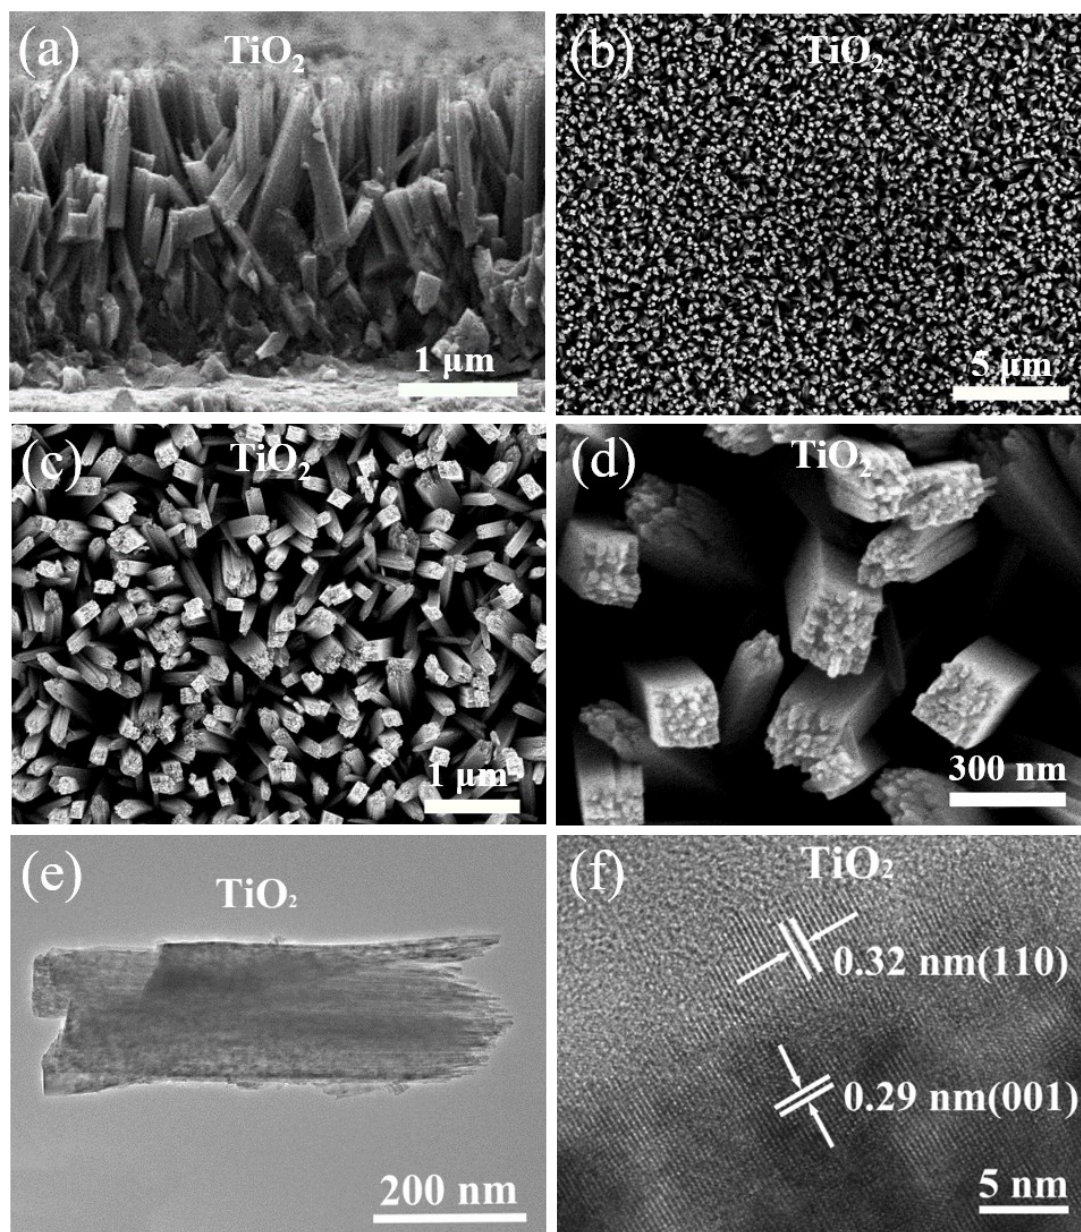

**Fig. S2** (a) The cross-sectional SEM images of the pristine TiO<sub>2</sub>. (b~d) SEM images of the pristine TiO<sub>2</sub> under different magnification (e~f) Representative TEM and HRTEM images of the pristine TiO<sub>2</sub>.

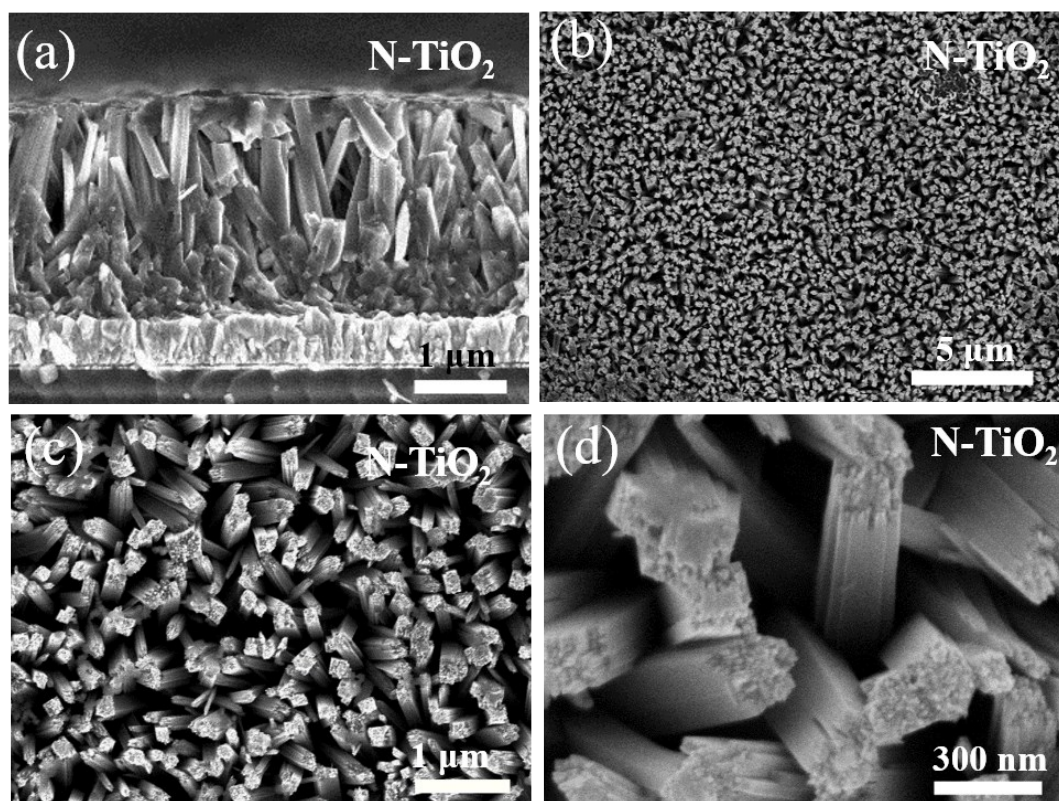

**Fig. S3** (a) The cross-sectional SEM images N-TiO<sub>2</sub>. (b~d) SEM images of N-TiO<sub>2</sub> under different magnification.

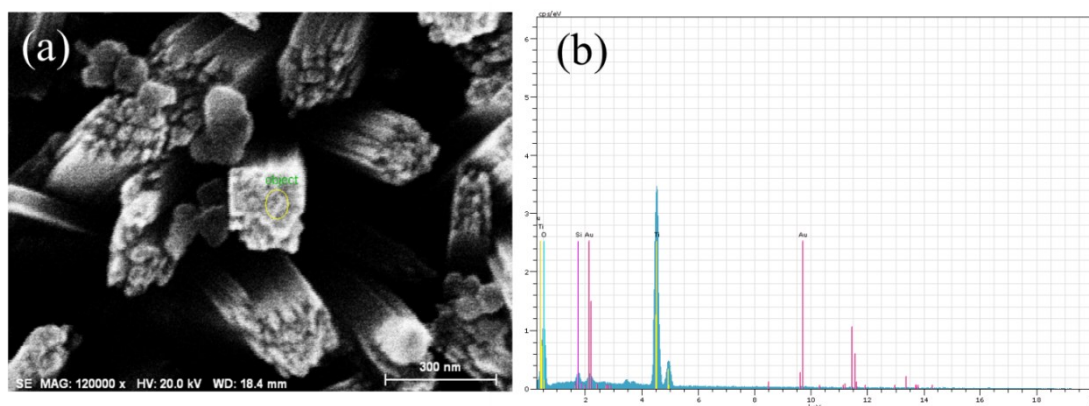

**Fig. S4** Morphological and elemental characterizations of as-prepared Au/N-TiO<sub>2</sub> nanoarrays. Typical SEM image (a) and EDX spectrum of Au/N-TiO<sub>2</sub> (b).

**Table S1.** Chemical compositions of Au/N-TiO<sub>2</sub> nanoarrays

| Element | Weight % | Atom % |
|---------|----------|--------|
| O       | 53.7     | 77.9   |
| Ti      | 43.61    | 21.14  |
| Au      | 1.78     | 0.21   |
| Si      | 0.91     | 0.75   |
| N       | 0        | 0      |



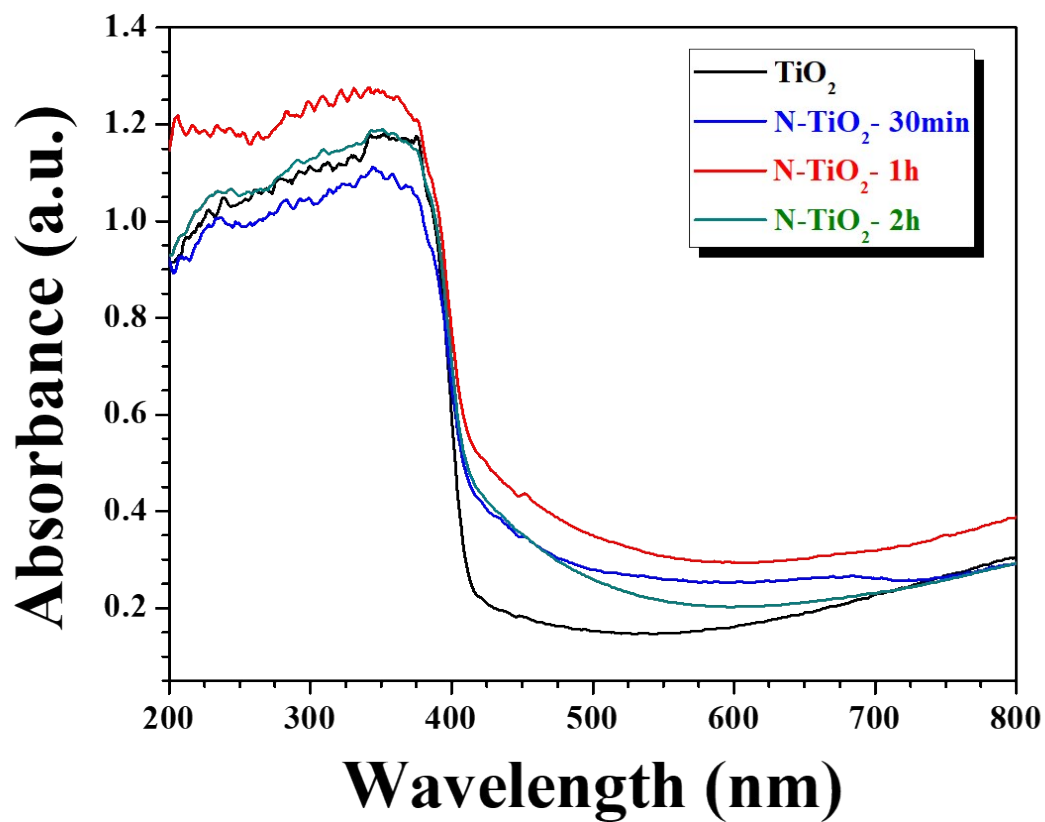

**Fig. S5** The UV-Vis spectra of pristine TiO<sub>2</sub> nanorods and N-TiO<sub>2</sub> nanorods calcined in ammonia with different time (30 min, 1 hour and 2 hours).

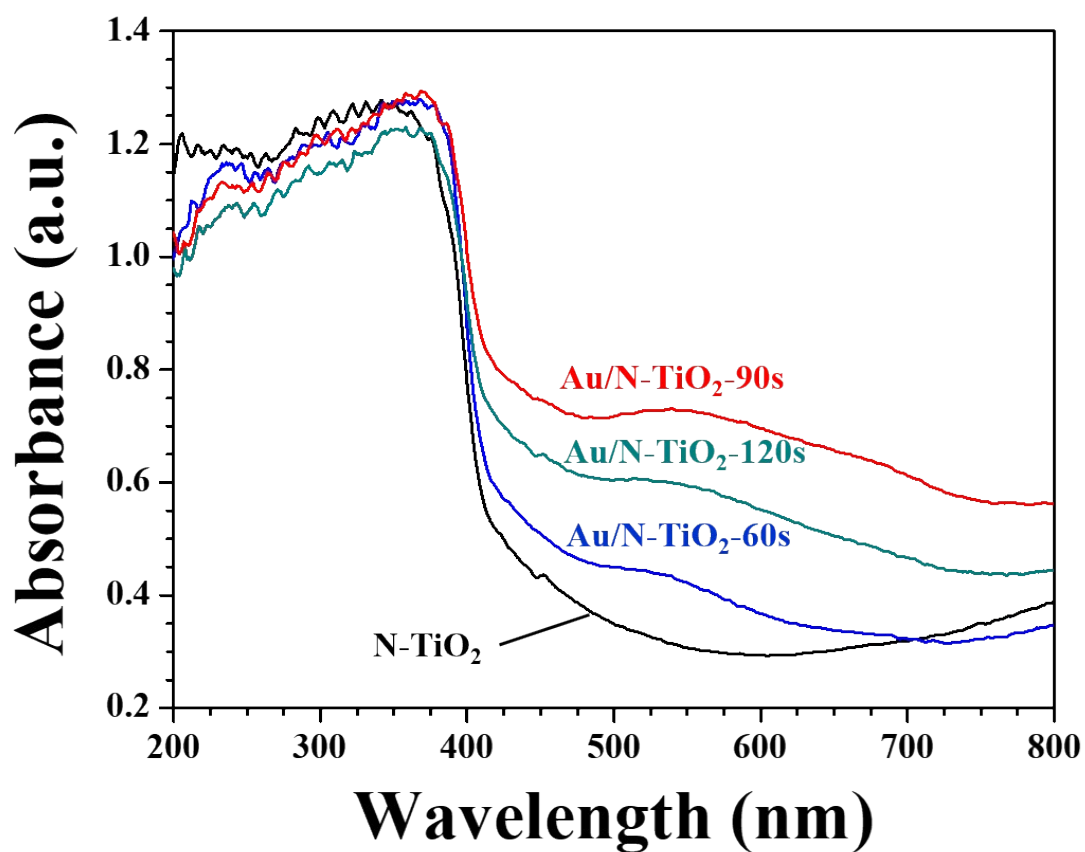

**Fig. S6** The UV-Vis spectra of N-TiO<sub>2</sub> nanorods and N-TiO<sub>2</sub> nanorods modified with Au nanoparticle by magnetron sputtering with different time (60 s, 90 s, 120 s).

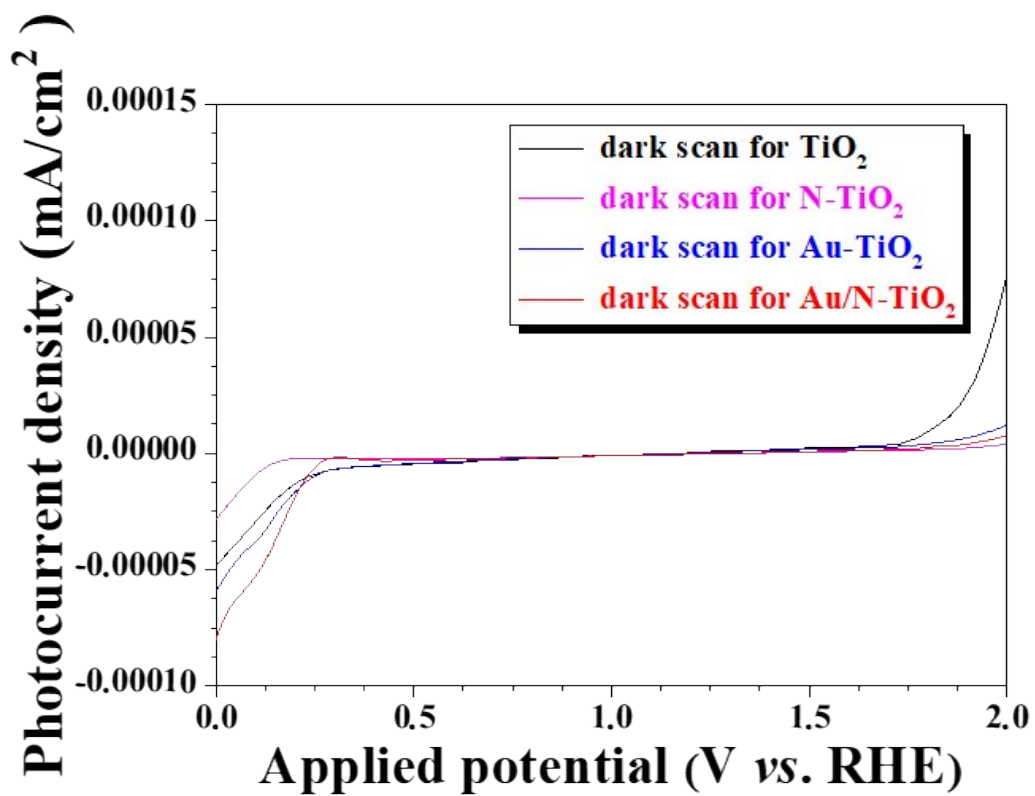

Fig. S7 The dark scans of pristine  $\text{TiO}_2$ ,  $\text{N-TiO}_2$ ,  $\text{Au-TiO}_2$  and  $\text{Au-N-TiO}_2$  photoanodes.



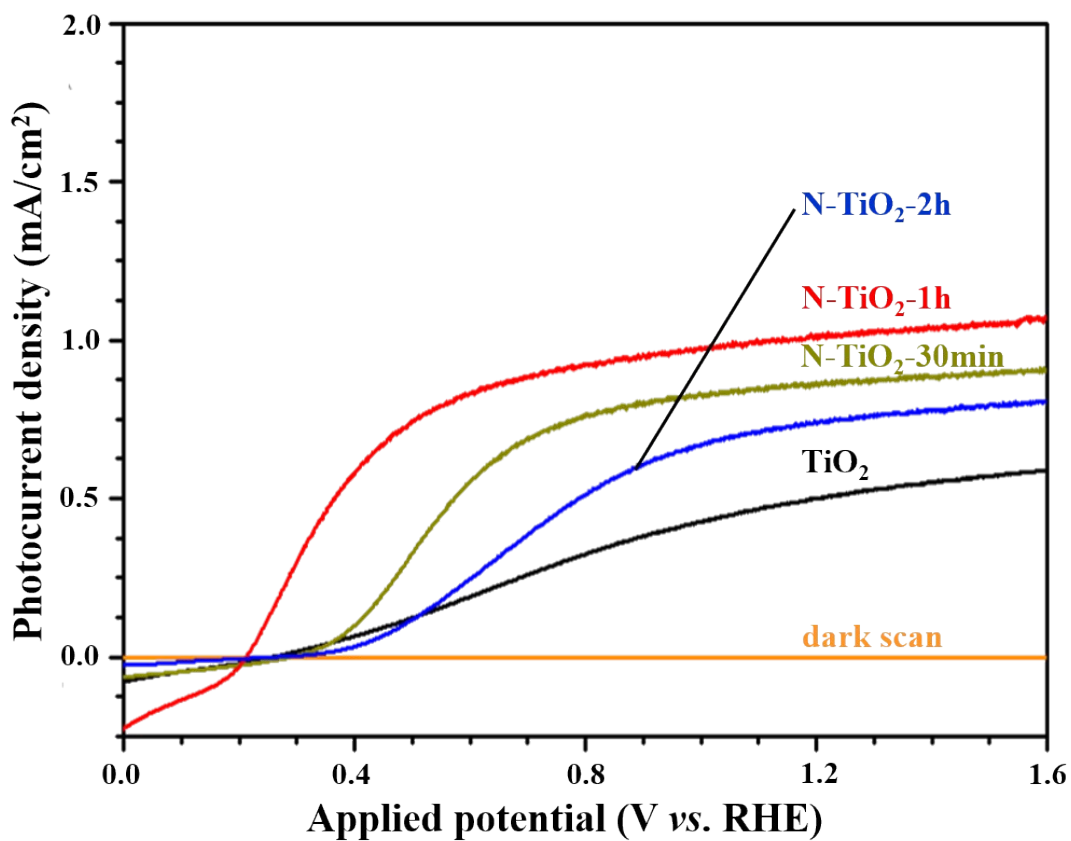

**Fig. S8** The linear sweep voltammetry curves of pristine TiO<sub>2</sub> and TiO<sub>2</sub> nanorarrays treated by ammonification with different times of 30 minutes, 1 hour and 2 hours under simulated sunlight.

**Table S2.** Representative summary of the recent reports on TiO<sub>2</sub>-based photoanodes for PEC (Since 2009)

| Synthesis approach                                                                       | Electrolyte                                                            | Photocurrent density<br>(at 1.23V vs. RHE) | Reference |
|------------------------------------------------------------------------------------------|------------------------------------------------------------------------|--------------------------------------------|-----------|
| Hydrogen plasma-treated 1D/3D TiO <sub>2</sub> nanorod arrays                            | 0.5 M H <sub>2</sub> SO <sub>4</sub>                                   | 0.369 mA/cm <sup>2</sup>                   | 1         |
| TiO <sub>2</sub> nanowire arrays via cotreatment with H <sub>2</sub> and NH <sub>3</sub> | 1 M KOH                                                                | 0.454 mA/cm <sup>2</sup>                   | 2         |
| Fe-doped TiO <sub>2</sub> nanorod arrays                                                 | 1M NaOH                                                                | ~0.7 mA/cm <sup>2</sup>                    | 3         |
| Si-doped TiO <sub>2</sub> nanorod arrays heated in air and in vacuum                     | 0.1M NaOH                                                              | 0.83 mA/cm <sup>2</sup>                    | 4         |
| TiO <sub>2</sub> nanorod array annealed in argon                                         | 1M NaOH                                                                | 0.978 mA/cm <sup>2</sup>                   | 5         |
| Au nanoparticles decorated TiO <sub>2</sub> nanorod arrays                               | 0.5 M Na <sub>2</sub> SO <sub>4</sub>                                  | ~1 mA/cm <sup>2</sup>                      | 6         |
| 1.8 μm long TiO <sub>2</sub> nanowires arrays coated by ALD TiO <sub>2</sub>             | 1M NaOH                                                                | ~1.08 mA/cm <sup>2</sup>                   | 7         |
| Flower-like branched TiO <sub>2</sub> nanorod arrays                                     | 1.0 M KOH                                                              | ~1.1 mA/cm <sup>2</sup>                    | 8         |
| TiO <sub>2</sub> Nanorod @ Nanobowl arrays                                               | 1M NaOH                                                                | 1.24 mA/cm <sup>2</sup>                    | 9         |
| C doped TiO <sub>2</sub> nanowire arrays                                                 | 1M NaOH                                                                | 1.3 mA/cm <sup>2</sup>                     | 10        |
| IrO <sub>2</sub> -hemin-TiO <sub>2</sub> nanowire arrays                                 | phosphate buffer saline                                                | 1.4 mA/cm <sup>2</sup>                     | 11        |
| TiO <sub>2</sub> -SrTiO <sub>3</sub> core-shell nanowire arrays                          | 1 M NaOH                                                               | 1.43 mA/cm <sup>2</sup>                    | 12        |
| Post-annealed N-TiO <sub>2</sub> nanowire arrays                                         | 1M NaOH                                                                | ~1.5 mA/cm <sup>2</sup>                    | 13        |
| Etching and W doping of TiO <sub>2</sub> nanowire arrays                                 | 1 M KOH                                                                | 1.53 mA/cm <sup>2</sup>                    | 14        |
| TiO <sub>2</sub> @g-C <sub>3</sub> N <sub>4</sub> @CoPi nanorod arrays                   | 0.1 M Na <sub>2</sub> SO <sub>4</sub>                                  | 1.6 mA/cm <sup>2</sup>                     | 15        |
| MoS <sub>2</sub> nanosheets coated on TiO <sub>2</sub> nanorod arrays                    | 0.35 M Na <sub>2</sub> S and<br>0.25 M Na <sub>2</sub> SO <sub>3</sub> | 1.7 mA/cm <sup>2</sup>                     | 16        |
| TiO <sub>2</sub> nanorod array modified by Au NPs and graphene quantum dots              | 1M NaOH                                                                | 1.75 mA/cm <sup>2</sup>                    | 17        |
| 1T-Phase MoS <sub>2</sub> nanosheets on TiO <sub>2</sub> nanorod arrays                  | 0.5 M Na <sub>2</sub> SO <sub>4</sub>                                  | ~1.8 mA/cm <sup>2</sup>                    | 18        |
| CoO <sub>x</sub> nanoparticles modified TiO <sub>2</sub> nanowire arrays                 | 0.1 M KOH                                                              | 2.09 mA/cm <sup>2</sup>                    | 19        |
| Hydrogen-treated TiO <sub>2</sub> nanowire array                                         | 1 M NaOH                                                               | 2.5 mA/cm <sup>2</sup>                     | 20        |
| Au nanoparticles modified branched TiO <sub>2</sub> nanorod arrays                       | 0.5 M Na <sub>2</sub> SO <sub>4</sub>                                  | 2.5 mA/cm <sup>2</sup>                     | 21        |

|                                                                       |                                        |                        |            |
|-----------------------------------------------------------------------|----------------------------------------|------------------------|------------|
| <b>TiO<sub>2</sub> nanowire/ gold or silver film</b>                  | 1 M NaOH                               | 2.6 mA/cm <sup>2</sup> | 22         |
| <b>Hydrogenated TiO<sub>2</sub>/ZnO heterojunction nanorod arrays</b> | •0.5 M Na <sub>2</sub> SO <sub>4</sub> | 2.7 mA/cm <sup>2</sup> | 23         |
| <b>Au/N-TiO<sub>2</sub> nanowire arrays</b>                           | 1 M KOH                                | 2.8 mA/cm <sup>2</sup> | This study |

**Table S3.** Fitted results of the EIS curves in Fig. 5c.

| Sample                | TiO <sub>2</sub> | N-TiO <sub>2</sub> | Au-TiO <sub>2</sub> | Au/N-TiO <sub>2</sub> |
|-----------------------|------------------|--------------------|---------------------|-----------------------|
| R <sub>S</sub> (Ω)    | 49.6             | 24.5               | 20.46               | 13.52                 |
| R <sub>trap</sub> (Ω) | 1530.2           | 1078               | 1267                | 309.8                 |
| R <sub>ct</sub> (Ω)   | 3546             | 2413               | 1112                | 919.6                 |

## References

- 1 V. Madhavi, P. Kondaiah, M. Ghosh and G. M. Rao, *Ceram. Int.*, 2020, **46**, 17791-17799.
- 2 S. Hoang, S. P. Berglund, N. T. Hahn, A. J. Bard and C. B. Mullins, *J. Am. Chem. Soc.*, 2012, **134**, 3659-3662.
- 3 W. Chakhari, J. Ben Naceur, S. Ben Taieb, I. Ben Assaker and R. Chtourou, *J. Alloy. Compd.*, 2017, **708**, 862-870.
- 4 C. Chen, Y. Wei, G. Yuan, Q. Liu, R. Lu, X. Huang, Y. Cao and P. Zhu, *Adv. Funct. Mater.*, 2017, **27**, 1701575 (1-9).
- 5 H. Huang, X. Hou, J. Xiao, L. Zhao, Q. Huang, H. Chen and Y. Li, *Catal. Today*, 2019, **330**, 189-194.
- 6 F. Xu, D. Bai, J. Mei, D. Wu, Z. Gao, K. Jiang and B. Liu, *J. Alloy. Compd.*, 2016, **688**, 914-920.
- 7 Y. J. Hwang, C. Hahn, B. Liu and P. Yang, *ACS Nano*, 2012, **6**, 5060-5069.
- 8 J. Liu, X. Yu, Q. Liu, R. Liu, X. Shang, S. Zhang, W. Li, W. Zheng, G. Zhang, H. Cao and Z. Gu, *Appl. Catal. B-Environ.*, 2014, **158-159**, 296-300.
- 9 B. Liu and E. S. Aydil, *J. Am. Chem. Soc.*, 2009, **131**, 3985-3990.
- 10 C. Cheng and Y. Sun, *Appl. Surf. Sci.*, 2012, **263**, 273-276.
- 11 J. Tang, B. Kong, Y. Wang, M. Xu, Y. Wang, H. Wu and G. Zheng, *Nano Lett.*, 2013, **13**, 5350-5354.
- 12 F. Wu, Y. Yu, H. Yang, L. N. German, Z. Li, J. Chen, W. Yang, L. Huang, W. Shi and L. Wang, *Adv. Mater.*, 2017, **29**, 1701432 (1-7).
- 13 G. Wang, X. Xiao, W. Li, Z. Lin, Z. Zhao, C. Chen, C. Wang, Y. Li, X. Huang, L. Miao, C. Jiang, Y. Huang and X. Duan, *Nano Lett.*, 2015, **15**, 4692-4698.
- 14 Y. Wang, Y. Y. Zhang, J. Tang, H. Wu, M. Xu, Z. Peng, X. G. Gong and G. Zheng, *ACS Nano*, 2013, **7**, 9375-9383.
- 15 Y. Li, R. Wang, H. Li, X. Wei, J. Feng, K. Liu, Y. Dang and A. Zhou, *J. Phys. Chem.*

- C, 2015, **119**, 20283-20292.
- 16 Y. Liu, Y. Li, F. Peng, Y. Lin, S. Yang, S. Zhang, H. Wang, Y. Cao and H. Yu, *Appl. Catal. B-Environ.*, 2019, **241**, 236-245.
- 17 A. Subramanian, Z. Pan, H. Li, L. Zhou, W. Li, Y. Qiu, Y. Xu, Y. Hou, C. Muzi and Y. Zhang, *Appl. Surf. Sci.*, 2017, **420**, 631-637.
- 18 Y. Pi, Z. Li, D. Xu, J. Liu, Y. Li, F. Zhang, G. Zhang, W. Peng and X. Fan, *ACS Sustain. Chem. Eng.*, 2017, **5**, 5175-5182.
- 19 J. Yuan, C. Li, T. Li, M. Jing, W. Yuan and C. M. Li, *Sol. Energ. Mat. Sol. C.*, 2020, **207**, 110349 (1-10).
- 20 G. Wang, H. Wang, Y. Ling, Y. Tang, X. Yang, R. C. Fitzmorris, C. Wang, J. Zhang and Y. Li, *Nano Lett.*, 2011, **11**, 3026-3033.
- 21 F. Xu, J. Mei, M. Zheng, D. Bai, D. Wu, Z. Gao and K. Jiang, *J. Alloy. Compd.*, 2017, **693**, 1124-1132.
- 22 M. Liu, N. de Leon Snapp and H. Park, *Chem. Sci.*, 2011, **2**, 80-87.
- 23 W. Feng, L. Lin, H. Li, B. Chi, J. Pu and J. Li, *Int. J. Hydrogen Energ.*, 2017, **42**, 3938-3946.
